# Supplementary material for: Structure of a MacAB-like efflux pump from Streptococcus pneumoniae
Source: PubMed Central journal article supplement (PMC5768738; doi:10.1038/s41467-017-02741-4), 2018-01-15
Supplement: 41467_2017_2741_MOESM1_ESM.pdf [file 41467_2017_2741_MOESM1_ESM.pdf]

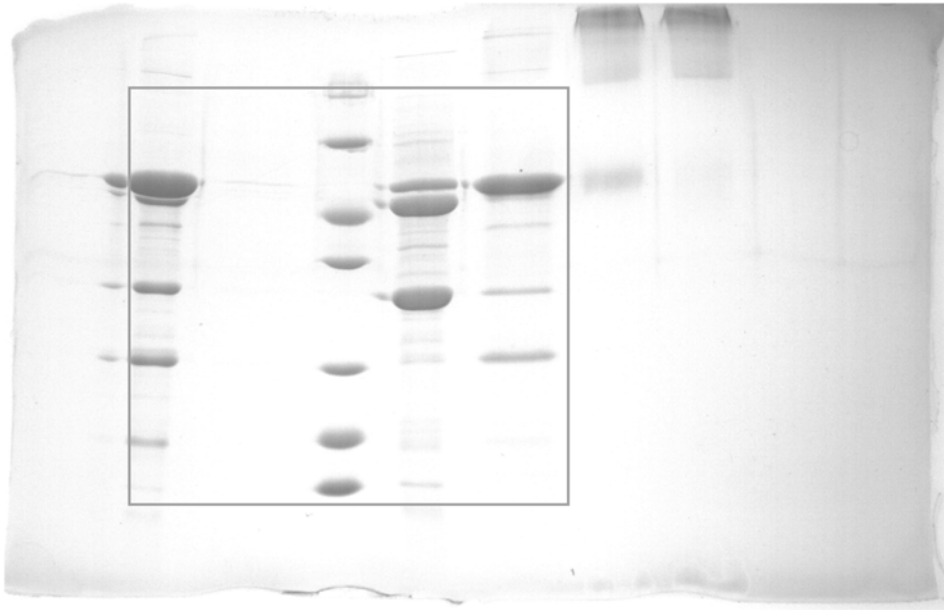

1

2 **Supplementary Figure 1** The full SDS-PAGE image of Figure 3a. The area within the rectangle was

3 adopted for Figure 3a.



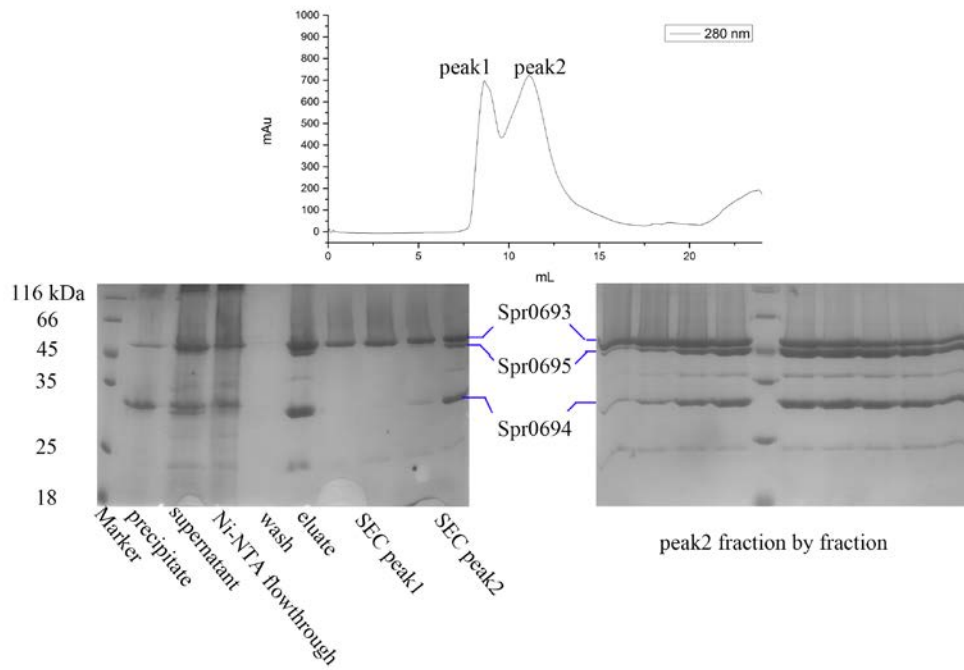

17

18 **Supplementary Figure 3** Size-exclusion chromatography profile with co-purification of  
 19 Spr0693-0694-0695.

20

21

22

23

24

25

26

27

28

29

30

31

32

33

34

35

36

37

38

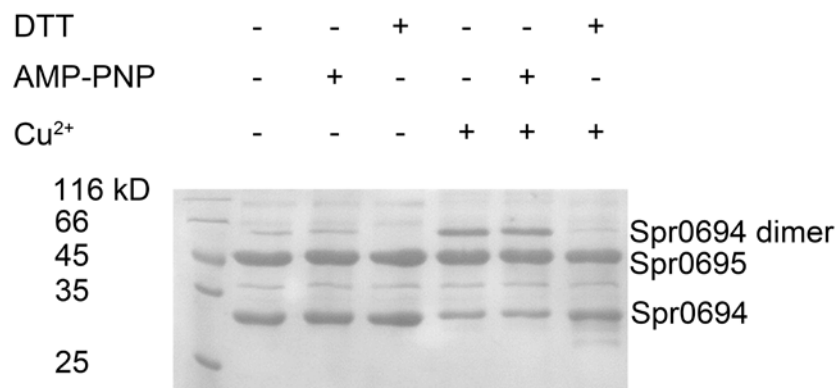

39

40 **Supplementary Figure 4** The disulfide-crosslinking experiments of Spr0694<sub>G173C</sub>-0695 mutant at  
 41 different conditions. The reaction mix was separated by SDS-PAGE. Molecular masses are indicated  
 42 on the left and the corresponding proteins are indicated on the right.

43

44

45

46

47

48

49

50

51

52

53

54

55

56

57

58

59

60

61

62

63

64

65

66

67

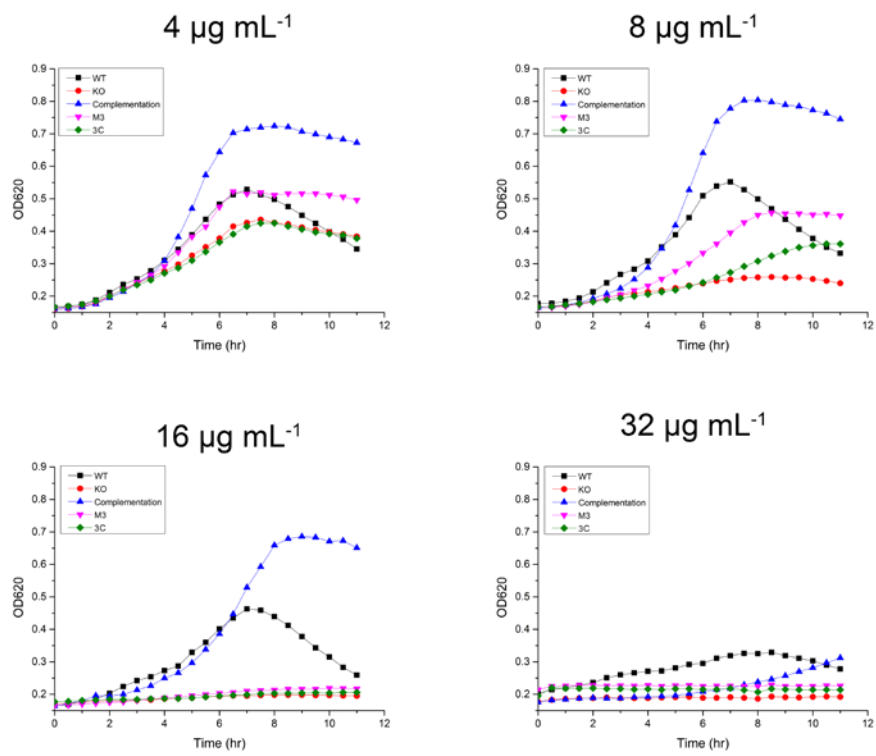

68  
 69  
 70  
 71  
 72  
 73  
 74  
 75  
 76  
 77  
 78  
 79  
 80  
 81

**Supplementary Figure 5** Growth curves of *S. pneumoniae* R6 and mutants in the presence of LL-37 at different concentrations.

a

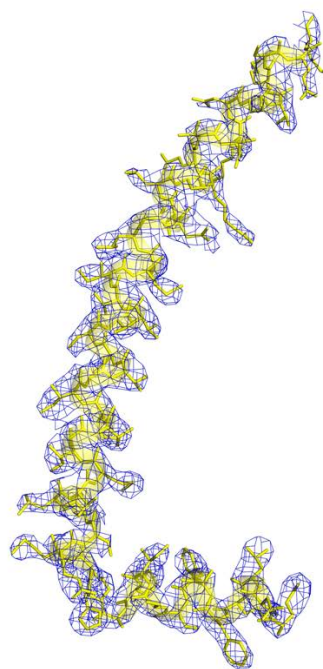

Spr0694-0695

b

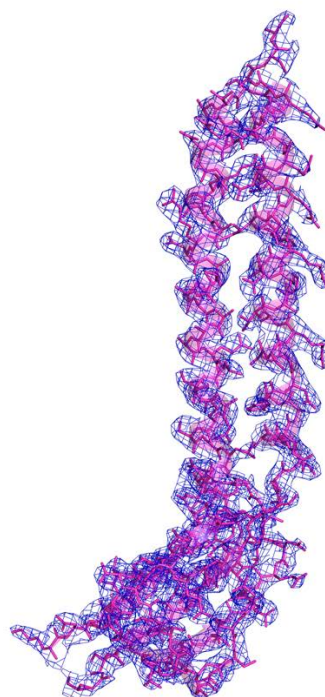

Spr0693

82

83 **Supplementary Figure 6** A portion of the *2Fo-Fc* electron density map of Spr0694-0695 and Spr0693,  
84 countered at 1.5  $\sigma$ . **(a)** Electron density map of TM1 of Spr0695. **(b)** Electron density map of the  
85  $\alpha$ -helical hairpin and lipoyl domains of Spr0693 monomer.

86

87

88

89

90

91

92

93

94

95

96

97

98

99

100

101

102

103

104

| Strains, plasmids or primers            | Description                                                                                                                                                                      | Source       |
|-----------------------------------------|----------------------------------------------------------------------------------------------------------------------------------------------------------------------------------|--------------|
| <b>Strains</b>                          |                                                                                                                                                                                  |              |
| WT                                      | <i>S. pneumoniae</i> R6; <i>spr0693-0694-0695</i> <sup>+</sup> ; Kan <sup>s</sup>                                                                                                | <sup>1</sup> |
| KO                                      | <i>S. pneumoniae</i> R6 derivative; $\Delta$ <i>spr0693-0694-0695</i> ::Janus cassette; Kan <sup>r</sup>                                                                         | This study   |
| Complementation                         | KO strain transformed with pJWV25- <i>spr0693-0694-0695</i> ; Kan <sup>r</sup> , Tet <sup>r</sup>                                                                                | This study   |
| M3                                      | KO strain transformed with pJWV25-M3; Kan <sup>r</sup> , Tet <sup>r</sup>                                                                                                        | This study   |
| 3C                                      | KO strain transformed with pJWV25-3C; Kan <sup>r</sup> , Tet <sup>r</sup>                                                                                                        | This study   |
| <b>Plasmids</b>                         |                                                                                                                                                                                  |              |
| pJWV25                                  | amp <sup>r</sup> , tet <sup>r</sup> , bgaA, P <sub>czeD</sub> ; integrate Zn <sup>2+</sup> -controlled target genes by double cross-over at the <i>S. pneumoniae</i> bgaA locus. | <sup>2</sup> |
| pJWV25- <i>spr0693-0695</i>             | amp <sup>r</sup> , tet <sup>r</sup> , bgaA, P <sub>czeD</sub> - <i>spr0693-0694-0695</i>                                                                                         | This study   |
| pJWV25-M3                               | amp <sup>r</sup> , tet <sup>r</sup> , bgaA, P <sub>czeD</sub> - <i>spr0693-0694-0695</i> <sub>K207A-R208A-K210A</sub>                                                            | This study   |
| pJWV25-3C                               | amp <sup>r</sup> , tet <sup>r</sup> , bgaA, P <sub>czeD</sub> - <i>spr0693-0694-0695</i> <sub>D49C-R208C/K52C-E205C/E374C-K207C</sub>                                            | This study   |
| <b>Primers for MICs</b>                 |                                                                                                                                                                                  |              |
| <b>Nucleotide sequence (5' to 3')</b>   |                                                                                                                                                                                  |              |
| Up-F                                    | GCGATATAACCAGCGCCTAGAATGGCAACTG                                                                                                                                                  | This study   |
| Up-R                                    | CAAACCTCTGTGCTCGAGCACTCGCAGCACCGATTGCTGC<br>ATAC                                                                                                                                 | This study   |
| Down-F                                  | CAGCATTATCCTCTAGAGAAGTTGGAGTATCAATCCCAGT<br>TGCCC                                                                                                                                | This study   |
| Down-R                                  | GCGTAGCCAAGAGCTGTGCGCATAGTTAAGAAG                                                                                                                                                | This study   |
| JC-F                                    | GGTGCTGCGAGTGCTCGAGCACAGAGTTTGTAGAAACGC<br>AAAAAGG                                                                                                                               | This study   |
| JC-R                                    | GATTGATACTCCAACCTTCTCTAGAGGATAATGCTGAAAAC<br>TCCTTGAAG                                                                                                                           | This study   |
| pJWV25-F                                | TGATAAGCTGAGCGCCGGTCGCTACCA                                                                                                                                                      | This study   |
| pJWV25-R                                | CTTTTTCTTCATCTTGTGCATCGTCATCCTTGTAGTCG                                                                                                                                           | This study   |
| pJWV25-Spr0693-F                        | GACCGGCGCTCAGCTTATCATTACATAACGAAGGGCTTC                                                                                                                                          | This study   |
| pJWV25-Spr0695-R                        | GACGATGACAAGATGAAGAAAAAGAATGGTAAAG                                                                                                                                               | This study   |
| Spr0695 <sub>K207A-R208A-K210A</sub> -F | GGAGGCTGCAGCGTCAGCAATATATGGGTTTGGTG                                                                                                                                              | This study   |
| Spr0695 <sub>K207A-R208A-K210A</sub> -R | CCCATATATTGCTGACGCTGCAGCCTCCGGACTAGTA                                                                                                                                            | This study   |
| Spr0695 <sub>D49C-K52C</sub> -F         | CAAGTCAATAAATGTATGACTTGCTCTCAGAAAAATATT<br>AGCGTC                                                                                                                                | This study   |
| Spr0695 <sub>D49C-K52C</sub> -R         | GCTAATATTTTTCTGAGAGCAAGTCATACATTTATTGACT<br>TGACGAGATAGG                                                                                                                         | This study   |
| Spr0695 <sub>E205C-K207C-R208C</sub> -F | GTTTATACTAGTCCGTGTGCTTGTGCTCAAAAATATATG<br>GGTTTGG                                                                                                                               | This study   |
